# Supplementary material for: Oxygenated Eremophilane- and Neolemnane-Derived Sesquiterpenoids from the Soft Coral Lemnalia philippinensis
Source: MDPI journal article supplement (doi:10.3390/md12084495), 2014-08-15

# Supplementary Information

Figure S1.  $^1\text{H}$  NMR spectrum of **1** in  $\text{CDCl}_3$ .

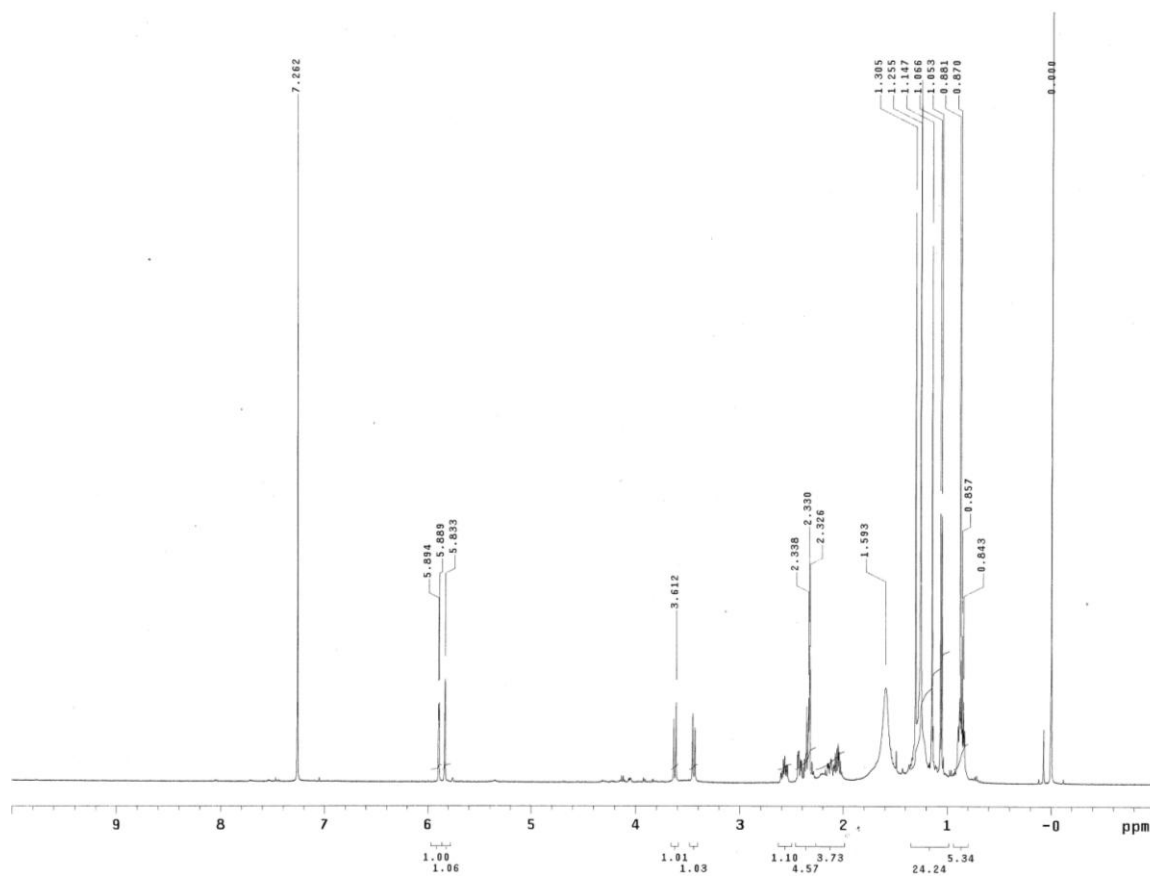

Figure S2.  $^{13}\text{C}$  NMR spectrum of **1** in  $\text{CDCl}_3$ .

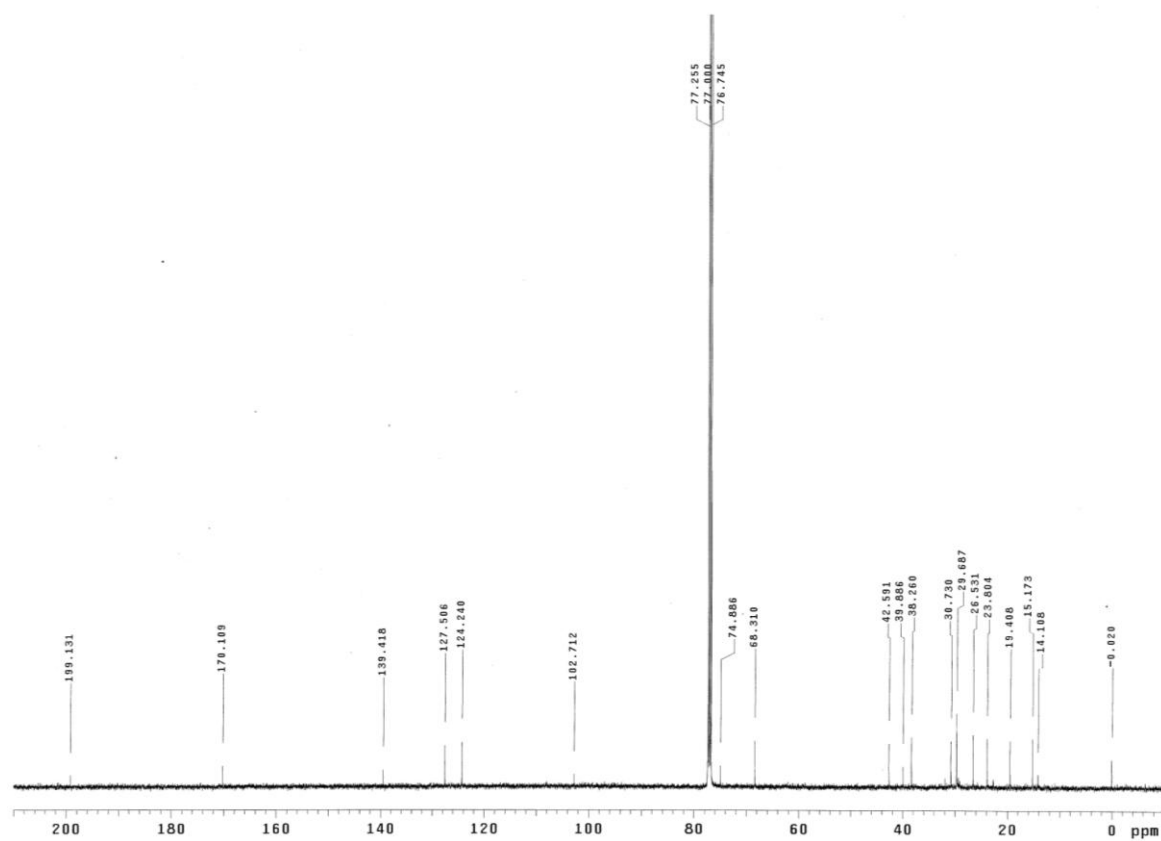

**Figure S3.**  $^1\text{H}$  NMR spectrum of **2** in  $\text{CDCl}_3$ .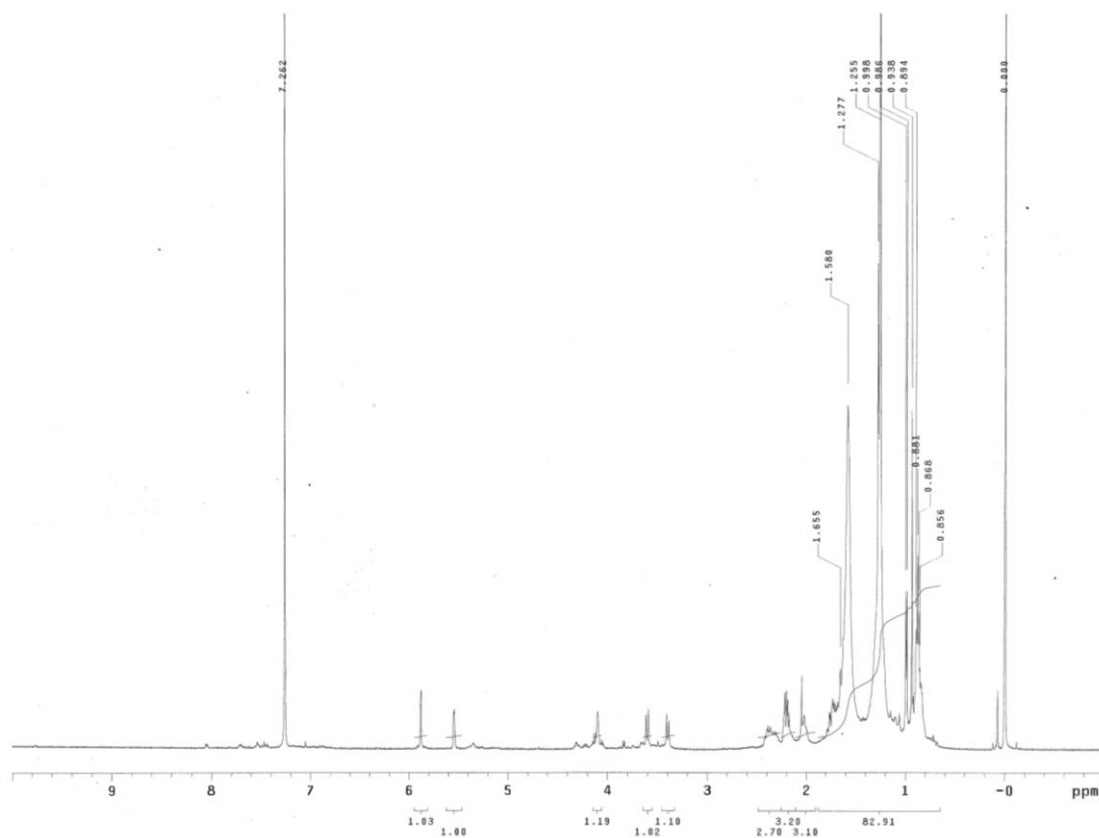**Figure S4.**  $^{13}\text{C}$  NMR spectrum of **2** in  $\text{CDCl}_3$ .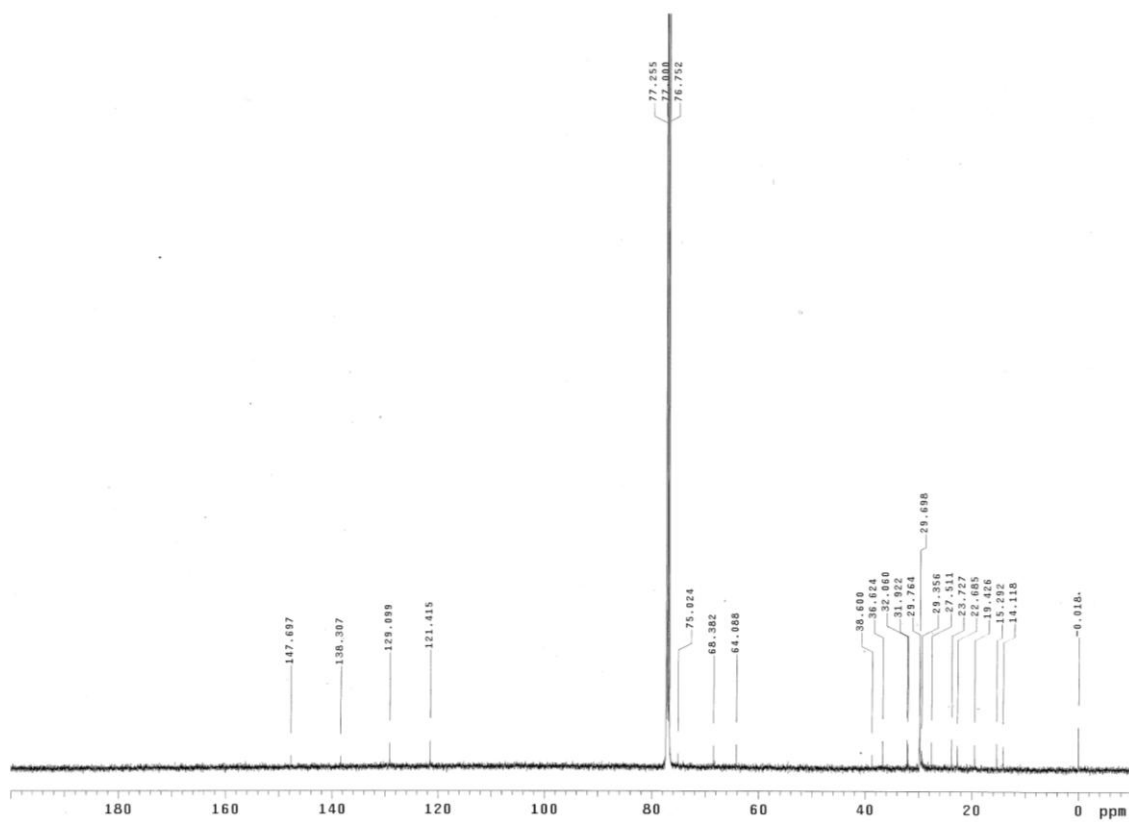

Figure S5.  $^1\text{H}$  NMR spectrum of **3** in  $\text{CDCl}_3$ .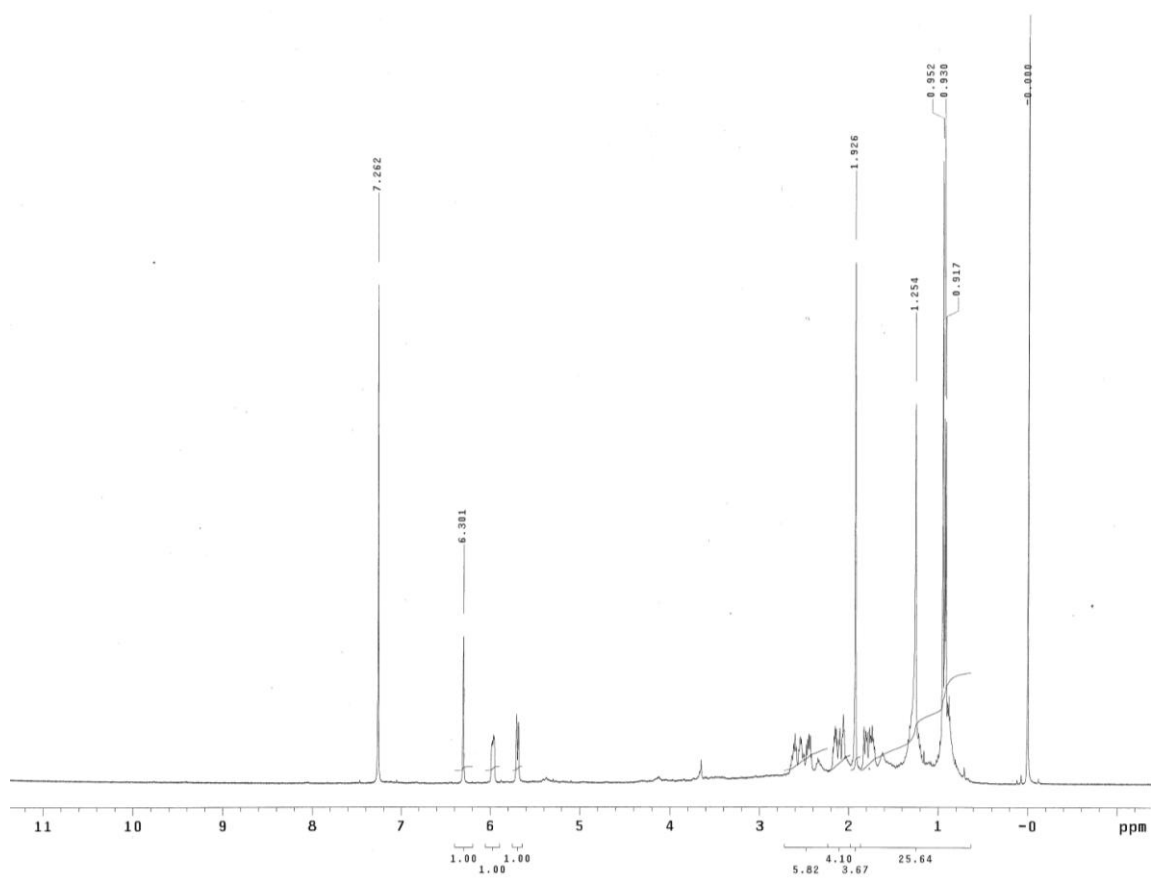Figure S6.  $^{13}\text{C}$  NMR spectrum of **3** in  $\text{CDCl}_3$ .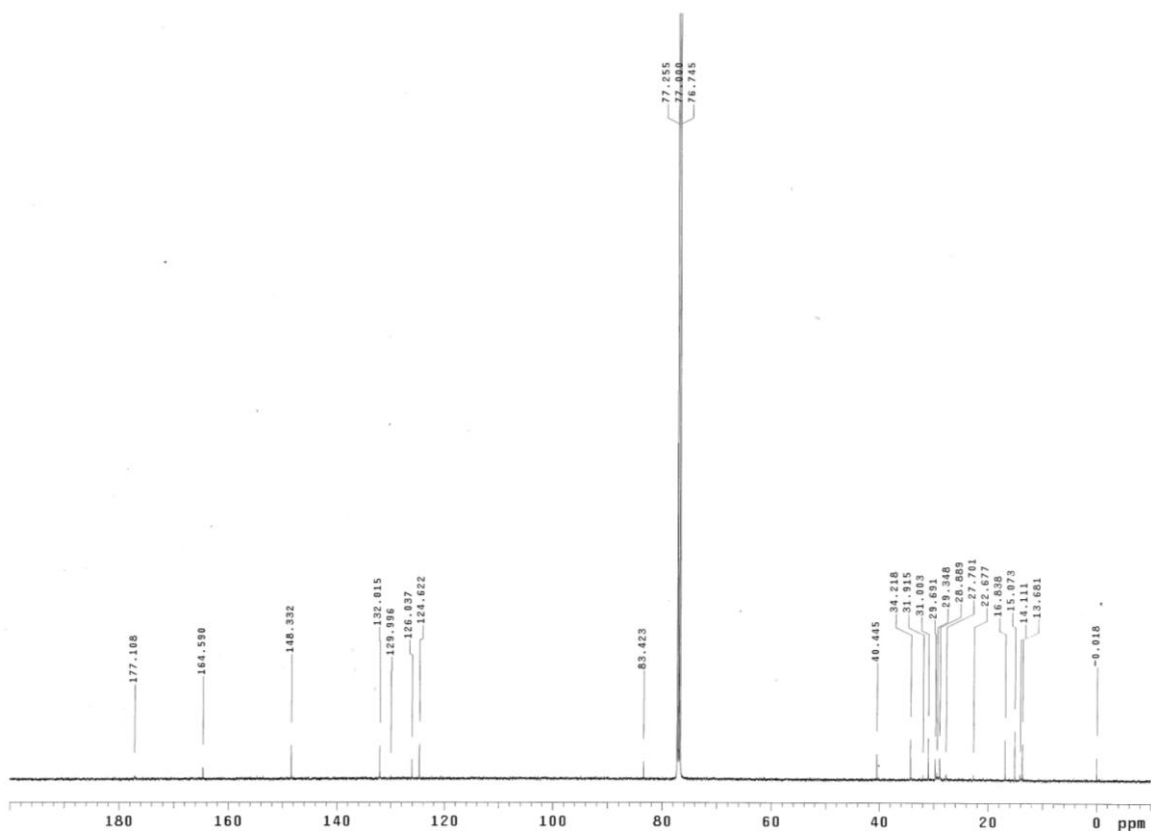

Supplement: s1 [file s1]
